# 1 Human Mammary Cells in a Mature, Stratified Epithelial Layer Flatten and Stiffen Compared to 2 Confluent and Single Cells

3 Hyunsu Lee<sup>1</sup>, Keith Bonin<sup>1</sup>, Martin Guthold<sup>1,\*</sup>

4 <sup>1</sup>Department of Physics, Wake Forest University, Winston-Salem, NC 27109

5 \*Corresponding author, [gutholdm@wfu.edu](mailto:gutholdm@wfu.edu)

6

## 7 Abstract

8 The epithelium forms a protective barrier against external biological, chemical and physical insults. So  
9 far, AFM-based, micro-mechanical measurements have only been performed on single cells and  
10 confluent cells, but not yet on cells in the physiologically relevant, mature epithelial layer.

11 Using a combination of atomic force, fluorescence and confocal microscopy, we determined the changes  
12 in stiffness, morphology and actin distribution of human mammary epithelial cells (HMECs) as they  
13 transition from single cells to confluency to a mature epithelial layer.

14 Single cells have a tall, round (planoconvex) morphology, have actin stress fibers at the base, have  
15 diffuse cortical actin, and have a stiffness of 1 kPa. Confluent cells become flatter, basal actin stress  
16 fibers start to disappear, and actin accumulates laterally where cells abut. Overall stiffness is still 1 kPa  
17 with two-fold higher stiffness in the abutting regions. Cells in an epithelial layer are flat on top and seven  
18 times stiffer (average, 7 kPa) than single and confluent cells. Epithelial layer cells show strong actin  
19 accumulation in the regions where cells adjoin and in the apical regions. Stiffness is significantly  
20 enhanced in the regions of adjoining cells, compared to the central regions of cells.

21 Physiologically, this previously unrecognized, drastic stiffness increase may be important to the  
22 protective function of the epithelium.

23

## 24 Introduction

25 *Importance of biomechanical properties of cells.* Over the last two decades, microscopic biomechanical  
26 analysis techniques, such as micropipette aspiration<sup>1</sup>, AFM indentation<sup>2</sup>, and magnetic and optical  
27 tweezers<sup>3,4</sup>, have progressed to the point where it is possible to study the mechanical properties of  
28 individual cells with relative ease. These studies have shown that cell mechanical properties are  
29 different for different cell types. The stiffnesses measured for isolated, cultured cells range  
30 approximately from 0.1 kPa to 40 kPa<sup>5</sup>, and the stiffness of cells correlates with biological function and  
31 the mechanical properties of tissue of origin. For example, neurons, constituents of the brain, which is  
32 one of the softest tissues, are soft with cell stiffness ranging from 0.1-2 kPa<sup>6</sup>. On the other hand, cardiac  
33 myocytes, which make up the cardiac muscle, are very stiff with elastic moduli in the 35-42 kPa range<sup>7</sup>.  
34 These studies also indicated that mechanical properties of cells correlate with their microenvironment  
35 and with cellular processes, including cell division<sup>8</sup>, adhesion<sup>9</sup>, migration<sup>10</sup>, motility<sup>11</sup> and  
36 differentiation<sup>12</sup>. Moreover, several human diseases closely correlate with abnormal stiffening of cells,  
37 e.g., asthma<sup>13</sup>, vascular disorders<sup>14</sup> and aging<sup>7,15,16</sup>; or softening of cells, e.g., cancer<sup>17-20</sup>. Therefore,

1 investigating the mechanical properties of cells can provide valuable insights into various cellular  
2 processes, disease and cancer progression, and they may be used as a potential biomarker.

3 *Actin*. Filamentous actin (F-actin) is a semi-flexible polymer, which is assembled from the monomeric,  
4 globular form of actin (G-actin). Actin filaments are highly dynamic and responsible for many cellular  
5 processes, including cytokinesis, changes in cell shape, cell motility, and intracellular trafficking.  
6 Additionally, actin filaments play an important role as a mechanotransducer, translating external  
7 physical forces into biochemical signals and leading to various cellular responses<sup>21–24</sup>. Actin filaments are  
8 organized into two types of main structures, stress fibers and cortical actin filaments, which play  
9 different mechanical roles within cells. Stress fibers, together with non-muscle myosin II, generate  
10 mechanical forces during movement, and they are responsible for the formation and maintenance of  
11 cell-to-cell or cell-to-extracellular matrix adhesions<sup>25–27</sup>. Cortical actin filaments form 50-200 nm thick  
12 networks underlying the inner surface of the plasma membrane.<sup>28</sup> They endow the cell with its  
13 mechanical integrity and contractility, which is important for cell shape and deformability. The  
14 components of the cytoskeleton – actin filaments, microtubules and intermediate filaments, the plasma  
15 membrane, the nucleus, and other cellular organelles are possible determinants of the mechanical  
16 properties of cells. Numerous studies, however, have shown a close correlation between actin filaments  
17 and cell stiffness, indicating that actin filaments are the primary contributor to cell mechanical  
18 properties. This is likely due to their higher-order structures and interaction with crosslinkers and other  
19 actin binding proteins. Cells treated with reagents that inhibit actin polymerization, such as cytochalasin  
20 D and latrunculin B, showed significantly reduced cell stiffness<sup>29–33</sup>. Conversely, cells treated with  
21 nocodazole, which interferes with microtubule polymerization, showed insignificant changes in cell  
22 stiffness<sup>29,32–34</sup>. Cancer cells are softer and easier to deform than their healthy counterparts<sup>20</sup>. It has  
23 been proposed that the lower stiffness of cancer cells is attributed to a reduction in the amount of actin  
24 filaments or an increase in disorganized actin structures<sup>35–37</sup>.

25 *In vivo*, cells continuously exchange signals with their neighboring cells, and they are linked together by  
26 cell-to-cell junctions, which are responsible for regulating tissue homeostasis and integrity<sup>38,39</sup>. One of  
27 the major cell-to-cell junctions is the adherens junction where cadherin receptors serve as adhesion  
28 molecules, and actin filaments interact with them via the catenin protein complex, which form a bridge  
29 between the cytoplasmic domains of cadherins and actin filaments. The cadherin-actin interactions also  
30 play a role in the reorganization of actin filaments during development of adherens junctions. For  
31 example, actin filaments associated with e-cadherins are perpendicularly oriented to the plasma  
32 membrane at early stages of development of adherens junctions of epithelial cells. In contrast, actin  
33 filaments align parallel to the cell borders in mature epithelial sheets.<sup>40,41</sup>

34 *Motivation*. As outlined above, the relevance of the mechanical properties of cells to a deeper  
35 understanding of key cellular processes was recognized over the last several years and a significant  
36 amount of work has been done determining the mechanical properties of different cell types. Initially,  
37 many studies concerning cell stiffness were performed on single, isolated cells, and the influence of  
38 confluency, cell packing, and cell-to-cell contact on cell stiffness has been underappreciated<sup>35,36</sup>.  
39 Recently it has been recognized that confluency and cell packing also need to be considered. Cell-cell  
40 interactions via adherens junctions underlie long-range correlations in cell stiffness<sup>42</sup>. Human mammary  
41 epithelial cells inside a colony (confluent layer) are stiffer than isolated cells<sup>43</sup>. The stiffness of MDCK II  
42 cells depends on confluency and cell size<sup>44</sup>. In most of these studies confluent cells were slightly stiffer,  
43 by a factor of two or less, than isolated cells<sup>42–46</sup>.

1 However, very few studies, if any, were performed on mature epithelial layers that had been grown for  
2 several days, which is the physiologically most relevant structure of epithelial cells.

3 *Current work.* Using a combination of atomic force microscopy, fluorescence microscopy and confocal  
4 microscopy, we investigated the stiffness, overall morphology and actin distribution of human  
5 mammary epithelial cells (HMECs) as they transition from single cells to confluency to a mature  
6 epithelial sheet conformation. We found that morphology, actin distribution and stiffness change  
7 significantly during this transition. Single cells have a tall, round morphology, with actin stress fibers at  
8 the base, diffuse cortical actin within the cell, and a stiffness of about 1 kPa. As cells become more  
9 confluent, they become flatter, actin stress fibers at the base start to disappear, and actin accumulates  
10 on the side where cells adjoin neighboring cells. The overall stiffness of these cells is similar to single  
11 (isolated) cells; however, with higher stiffness values in the adjoining regions where actin accumulates.  
12 Cells in an epithelial layer are flat at the top (apex), consistent with the physiologically typical, stratified,  
13 cuboidal epithelium form of HMECs. These cells are several times stiffer than single and confluent (but  
14 not yet packed) cells. Epithelial layer cells show strong actin accumulation in the region where cells  
15 adjoin and in the apical region. Stiffness is not uniform, as it is significantly enhanced in the regions of  
16 adjoining cells, compared to the central region of the cell. This previously unrecognized increase in cell  
17 stiffness could be physiologically important since epithelial cells form a key barrier to protect the body  
18 from biological, chemical, and mechanical insults.

19

20

## 1 **Materials & Methods**

### 2 **Cell culture**

3 Primary human mammary epithelial cells (HMECs; Lonza, Basel, Switzerland) were cultured in T-75  
4 flasks in mammary epithelial basal medium (MEGM basal medium CC-3151; Lonza) that was  
5 supplemented with bovine pituitary extract, insulin, hydrocortisone and recombinant human epidermal  
6 growth factor (MEGM Bullet Kit CC-4136; Lonza). Cells were maintained in an incubator under standard  
7 conditions (36.5 °C, 5% CO<sub>2</sub>). HMECs were used within 6 passages.

8 50 mm glass bottom dishes (FluoroDish; World Precision Instruments, Sarasota, USA) were used for the  
9 imaging and indentation experiments. Collagen type IV (100 µg/ml in Dulbecco's Phosphate-Buffered  
10 Saline; Sigma-Aldrich, St. Louis, USA) and laminin (100 µg/ml in DPBS; Sigma-Aldrich) were mixed at a 1:2  
11 ratio to coat the dishes with 1 µg/cm<sup>2</sup> of collagen IV and 2 µg/cm<sup>2</sup> of laminin. The coating solution was  
12 placed into the dish, and the dish was incubated for 1 hour. The remaining solution in the dish was  
13 removed, then the dish was rinsed with sterile, deionized water. The dish was dried for 15 minutes  
14 under UV light before adding cells.

15 HMECs at 70-80% confluency were reseeded onto the prepared 50 mm dishes and cultured in the  
16 incubator for 1 to 3 days before the atomic force microscope and other imaging experiments were  
17 performed. Cell reseeding densities of 500 cells/cm<sup>2</sup> (low), 10,000 cells/cm<sup>2</sup> (medium) or 40,000  
18 cells/cm<sup>2</sup> (high) were used to control the confluency state of the cells, resulting in isolated cells,  
19 confluent cells and epithelial cell layers, respectively.

20

### 21 **Atomic Force Microscopy**

22 An atomic force microscope (MFP-3D-BIO; Oxford Instruments, Abingdon, UK) combined with an  
23 inverted optical microscope (X73; Olympus, Tokyo, Japan) was used to carry out topographical imaging  
24 and nanoindentation of live cells. A cell culture dish was mounted on the petri-dish heater stage and the  
25 cells were maintained in culture medium at 36.5°C during the AFM experiments. Each session for the  
26 AFM measurements was conducted within 3 hours of removal from the incubator to avoid effects of pH  
27 changes of the culture medium on cells. A soft AFM probe (BioTool cell XXL, nominal spring constant  $k =$   
28  $0.1 \text{ N/m}$ , resonance frequency  $f = 50 \text{ kHz}$ ; Nanotools, Munich, Germany) was used for topographical  
29 imaging of live cells. The probe has a long conical carbon tip, which is critical to obtain a good image due  
30 to the height of the cell compared to the tip height; cantilevers with shorter tips may touch the cell with  
31 the side of the cantilever, rather than with the tip. Topographic images were obtained in AC mode with  
32 a 0.5 Hz scanning rate over an  $80 \times 80 \mu\text{m}^2$  area. A tipless, rectangular silicon nitride AFM cantilever  
33 (HYDRA6R-200NG-TL, nominal spring constant  $k = 0.035 \text{ N/m}$ , resonance frequency  $f = 17 \text{ kHz}$ ; Applied  
34 NanoStructures, Mountain View, USA), to which a 5.3 µm diameter fluorescent melamine microsphere  
35 (Microsphere-Nanospheres, Cold Spring, USA) was attached, was used for the cell indentation  
36 experiments. The protocol to attach the microsphere is described next.

37 A clean glass coverslip was used as a substrate for the 5.3 µm microspheres and glue. 20 µl of  
38 microspheres in 2.5% aqueous suspension were deposited on the glass coverslip. A paper wipe was used  
39 to absorb and dry the water after the spheres sank to the coverslip surface, which occurred in a few

1 minutes. Most spheres formed clusters, but some isolated spheres existed on the coverslip; these  
2 isolated spheres can be picked up by a cantilever. Using a pipette tip, a small amount (approximately 20  
3  $\mu\text{l}$ ) of mixed, two-part marine epoxy glue was transferred onto the same coverslip. Using another  
4 coverslip, the glue was spread to a thin layer close to where the microspheres were deposited. The glue  
5 was dried for 20 minutes before moving on to the next step; drying for this period increased the  
6 viscosity of the low viscosity glue to a viscosity level appropriate for the following dip-pen nano-  
7 lithography step. The AFM mounted on the optical microscope was used as a nanomanipulator for fine  
8 positioning, and the micrometers for the movement of the sample stage and the AFM head were used  
9 for coarse positioning. After putting the coverslip on the sample stage, the AFM cantilever was  
10 positioned in the middle of the field of view of the 40x lens. The laser was focused on the end of the  
11 cantilever, as is standard, and the deflection signal was monitored during the following processes to  
12 avoid breaking the cantilever. The edge of the spread glue on the coverslip was moved under the end of  
13 the cantilever. A small amount of the glue was applied to the end of the cantilever by lowering the AFM  
14 head manually while observing the cantilever through the optical microscope. After applying the glue,  
15 the cantilever was retracted to a safe distance above the surface ( $> 20 \mu\text{m}$ ) and then an isolated  
16 microsphere was positioned under the cantilever. Using the AFM software, which can control the  
17 position of the piezo scanners with nm resolution, the cantilever was finely positioned above the  
18 microsphere. The cantilever was lowered by the z-piezo scanner until it contacted the microsphere. A  
19 few seconds after the contact, the cantilever was retracted and taken out of the AFM head. The  
20 cantilever with the microsphere was cured overnight under ambient conditions. A representative bead-  
21 modified cantilever is shown in Fig. 1.

22 To measure the spring constant of an AFM probe, we used the 'GetReal' automated probe calibration  
23 function in the Asylum Research software, which is based on the thermal noise method<sup>47</sup> and Sader's  
24 method<sup>48</sup>. The software first determines the spring constant, using Sader's method with Q factor, the  
25 resonance frequency from the thermal noise spectrum, and the dimensions of a cantilever.  
26 Subsequently, GetReal determines a parameter, the so-called inverse optical lever sensitivity (InvOLS),  
27 which is needed to convert the photo diode signal in volts to displacement of the cantilever in  
28 nanometers, using the thermal noise method and the spring constant calculated in the previous step.  
29 However, we used the InvOLS determined by a different, more direct way. Specifically, by measuring the  
30 slope of the deflection voltage vs. z distance curve on a hard surface. There was usually a 10-20 %  
31 discrepancy between this slope method as compared to the thermal noise method. Since the latter  
32 slope method is more direct, we used that value.

33 The following equation, derived from the Hertz model, was used to determine the Young's modulus of  
34 each cell.

$$35 \quad F = \frac{4\sqrt{R}}{3} \frac{E}{1-\nu^2} \delta^{3/2} \quad (1)$$

36 Here  $F$  is the indentation force,  $R$  is the bead radius,  $E$  is the Young's modulus,  $\nu$  is the Poisson's ratio of  
37 a cell (taken to be 0.5), and  $\delta$  is the indentation depth. Three to five indentations were carried out on  
38 the center of each cell to obtain force versus indentation depth curves. Since the Young's modulus of  
39 cells depends on the loading rate and indentation depth, the speed of the indentation was fixed at 5  
40  $\mu\text{m}/\text{sec}$  and the indentation depth was maintained in the range of 0.6 to 1  $\mu\text{m}$ . The obtained force  
41 curves were processed using the built-in Hertz model fitting tool of the Asylum AFM software. The

1 Young's modulus values of the curves were arithmetically averaged for each cell. A representative  
2 indentation curve and fit, according to the Hertz model, is shown in Fig. 1(c).

3 A stiffness map, also called a force-volume map, consisting of  $32 \times 32$  pixels within an  $80 \times 80 \mu\text{m}^2$   
4 area, was acquired by taking individual force versus indentation curves on each pixel. Like the single  
5 indentation, the indentation depth and loading speed for a stiffness map on each pixel were set in the  
6 range of 0.6 to 1  $\mu\text{m}$  and 5  $\mu\text{m}/\text{sec}$ , respectively. It took approximately 18 minutes, which is short  
7 enough to avoid drifts caused by cell movements, to obtain a stiffness map with these conditions. The  
8 Young's modulus of each pixel was determined by fitting the Hertz model for the 5.3  $\mu\text{m}$  microsphere to  
9 the individual curves, using the analysis tools of the AFM software.

## 10 **Fluorescence microscopy**

11 For fluorescence imaging of F-actin and nuclear structures of live cells, F-actin filaments and the nuclei  
12 were labeled with 1  $\mu\text{M}$  of SiR-actin (Cytoskeleton, Denver, USA) and 1  $\mu\text{g}/\text{ml}$  of Hoechst 33342  
13 (Invitrogen, Carlsbad, USA), respectively. Each of the dyes, dissolved in DMSO, were directly added to  
14 the culture medium, and the cells were incubated for 30 minutes prior to fluorescence imaging.

15 Epifluorescence images correlating to the AFM topographic images were taken by the X73 Olympus  
16 inverted microscope, which is situated under the AFM, with a 60x oil immersion lens (numerical  
17 aperture, NA = 1.3) and a Hamamatsu digital camera (C11440, ORCA-Flash2.8, Hamamatsu,  
18 Hamamatsu, Japan). Filter sets for DAPI and Cy5 channels were used for Hoechst 33342 and SiR-actin,  
19 respectively.

20 For confocal fluorescence imaging, a confocal microscope (LSM 880; Carl Zeiss, Oberkochen, Germany)  
21 in Airy-scan mode with a 63x oil immersion lens (NA = 1.40) was used. A 405 nm diode laser and a 633  
22 nm He-Ne laser were used as excitation lasers for Hoechst 33342 and SiR-actin. Each image was  
23 acquired by scanning twice with the two lasers in turn. Cross-sectional views consisting of 40-60 layers  
24 were acquired by single-line scanning which can be done in a few minutes.

25

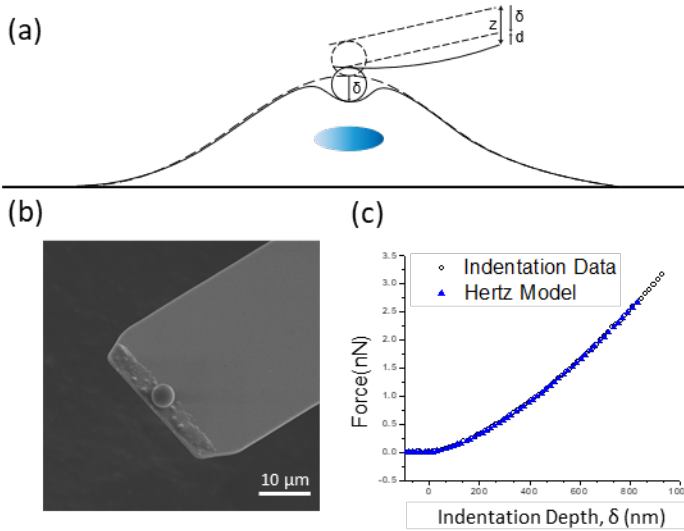

1

2 *Figure 1. (a) Schematic of experimental indentation set-up. A cell is indented by an AFM cantilever with a spherical*  
3 *probe. The vertical position of the cantilever is moved by  $z$ ; the cantilever bends by  $d$ ; the cell is indented by  $\delta$ ;  $z = d$*   
4 *+  $\delta$ . (b) Top-view SEM micrograph of an AFM probe with an attached  $5.3 \mu\text{m}$  microsphere. (c) Example of a force vs.*  
5 *indentation curve obtained by atomic force microscopy. The indentation data was fit using the Hertz model*  
6 *(equation 1).*

## 1 **Results**

2 One of the key functions of epithelial cells is to form a protective barrier between the inside of the body  
3 and the outside world. The overall goal of our work was to characterize the global morphology, stiffness  
4 and actin distribution of human mammary epithelial cells as they progress from single cells, through  
5 confluency, to a mature, epithelial layer.

### 6 **Global morphology and actin formation of HMECs at different degrees of confluency**

7 AFM and fluorescence images were taken to determine how cellular morphology and F-actin structure  
8 change with increasing cell confluence (Fig. 2). AFM deflection images (error signal) indicate the  
9 topography of single HMECs, confluent HMECs, and HMECs of epithelial layers (Fig. 2 a-c). Cell areas  
10 tend to decrease as cells reach confluence and then form the basal layer of the epithelium. However,  
11 additional cells that form the apical level (second layer) of the epithelium had the largest area compared  
12 to single, confluent cells and basal epithelial layer cells. The cross-sectional profiles (Fig. 2 b),  
13 corresponding to the white lines in Fig. 2a, show the height differences between the lowest and the  
14 highest topographical features. The measured height differences for the single cell, confluent cells and  
15 the epithelial layer shown in Fig.2 are 8.5  $\mu\text{m}$ , 2.5  $\mu\text{m}$  and 300 nm, respectively. This indicates that cells  
16 become flatter as they reach confluence and form the epithelium. We took epi-fluorescence microscope  
17 images of actin filaments stained with SiR-actin of the cells corresponding to the AFM images (Fig 2. g-l).  
18 Using a 60x oil immersion lens (NA = 1.3) and shallow depth of field, it was possible to distinguish actin  
19 filaments in the apical focal plane (Fig. 2 g-i) and basal focal plane (Fig. 2 j-l). In the apical plane of the  
20 single cell (Fig. 2g), the actin distribution is diffuse, with no apparent, distinct actin filaments. The image  
21 of the apical focal plane of the confluent cells (Fig. 2h) shows thin cortical mesh actin filaments in the  
22 middle of cells and a strong, blurred distribution of circumferential actin. Some of the circumferential  
23 actin is in focus and some out of focus, indicating that it is vertically distributed along the entire height  
24 of the cell. In the apical focal plane of the epithelial layer cells (Fig. 2i), we observed dense, distinct,  
25 circumferential actin filaments and filaments that stretched out to span cell-to-cell contact regions. Note  
26 that the apical plane has a smaller number of cells than the basal plane. Thick and dense dorsal stress  
27 fibers were observed in the basal focal plane of the single cell (Fig. 2j), which indicates that the cell was  
28 actively migrating toward the upper left of the image. The image in the basal focal plane of the  
29 confluent cells (Fig. 2k) shows that thinner, sparse, and unidirectionally aligned stress fibers and actin  
30 filaments surrounding the cells were formed, indicating a more stationary and collectively migrating cell.  
31 Overall, in the basal focal plane of the cells in the epithelial layers (Fig. 2l), the amount of stress fibers is  
32 markedly decreased, and the stress fibers are randomly oriented, indicating non-migrating, spatially  
33 stable cells.



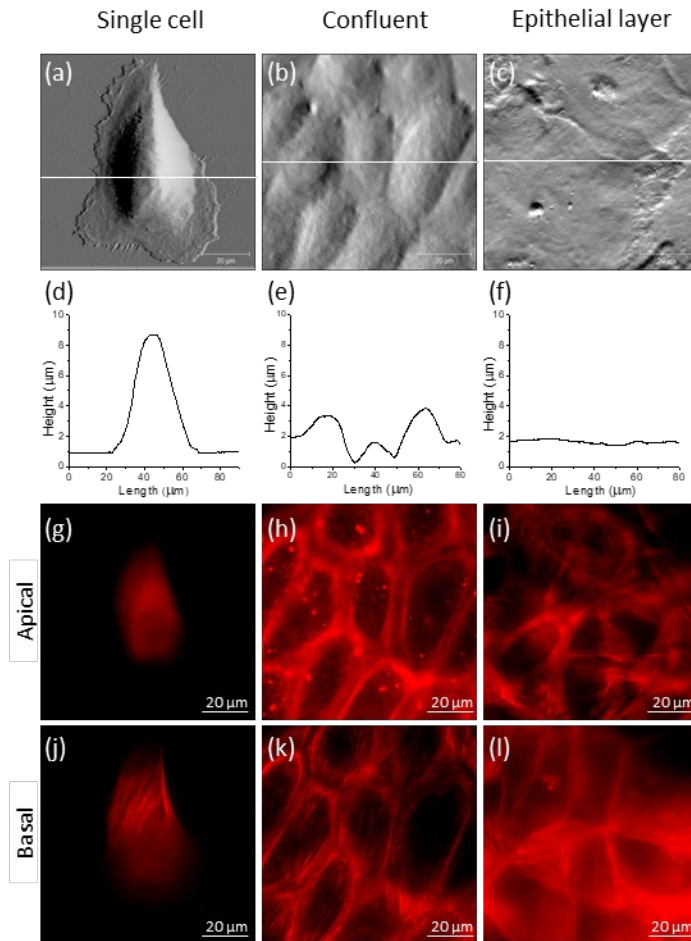

1

2 *Figure 2. AFM deflection images of HMECs in (a) single, (b) confluent, and (c) mature epithelial layer states. (d-f)*

3 *Cross-sectional line profiles of the AFM deflection images corresponding to each of the white lines in (a-c).*

4 *Fluorescence images of actin filaments stained with SiR-actin in the (g),(h),(i) apical and (j),(k),(l) basal levels of the*

5 *cells.*

6

7

8

9

10

11

12

13

14

15

1

2

### 3 **Young's modulus of individual cells measured with an AFM.**

4 The first two histograms (Figs. 3a & b) show the distributions of Young's moduli measured in the central  
5 region of individual cells in the single and confluent states, and the third histogram (Fig. 3c) is the  
6 distribution of Young's moduli measured on the top layer of the epithelium. Note that the indentation  
7 locations on the top layer were randomly chosen due to the ambiguity in determining the borderlines  
8 between cells that is a result of the continuous and flat morphology as shown in Fig. 2c. Also, note that  
9 the x-axis scales of Figs. 3a & b are the same, while the scale of Fig. 3c is much larger. The width of the  
10 distribution of single cell moduli (Fig. 3a) is slightly wider than that of confluent cells (Fig. 3b), while the  
11 averaged Young's modulus,  $E$ , of single cells and confluent cells are equal within error, with  $E = 1.01 \pm$   
12  $0.52$  kPa ( $N = 183$ ) and  $1.09 \pm 0.51$  kPa ( $N = 199$ ), respectively. According to a Student's t-test analysis,  
13 the two distributions are not statistically different ( $p > 0.5$ ). The width of the distribution of Young's  
14 moduli of the epithelium (Fig. 3c) is much wider than the other two distributions, ranging from 0.37 kPa  
15 to 37 kPa, and the averaged Young's modulus of the epithelium increased about seven-fold to  $7.09 \pm$   
16  $5.8$  kPa ( $N = 717$ ). Compared to single and confluent cells, the increase in Young's modulus is statistically  
17 significant ( $p < 0.001$ ).

18 To determine if overall cell area and shape affect stiffness, we plotted the Young's modulus vs. aspect  
19 ratio and Young's modulus vs. cell area (Fig. 3e & f). Note that the data used for these plots are sub-sets  
20 of the histograms, but the data for the epithelium was not included in these plots because the modulus  
21 magnitudes differ significantly (see discussion). The aspect ratios of the single cells ranged from  
22 approximately 2 to 14, and the Young's modulus of single cells tends to increase with higher aspect  
23 ratios. On the other hand, the distribution of the aspect ratios of the confluent cells was localized  
24 around 2 with the Young's modulus ranged between 0.3 and 2 kPa. Single cell areas ranged from  $250$   
25  $\mu\text{m}^2$  to  $3800$   $\mu\text{m}^2$ , and the Young's modulus tends to increase as cell area increases. The areas of the  
26 confluent cells did not exceed  $1800$   $\mu\text{m}^2$ , and there was no correlation between cell area and stiffness.  
27 Taken together, although the Young's moduli of both single and confluent cells ranged between 0.3 kPa  
28 and 3 kPa and the two averaged values are very similar, single cells saw their stiffness (force/area) rise  
29 as each cell stretched out over a larger region. When comparing cells smaller than  $1700$   $\mu\text{m}^2$  (see Fig.  
30 5f), confluent cells were slightly stiffer than single cells in this small cell area regime.

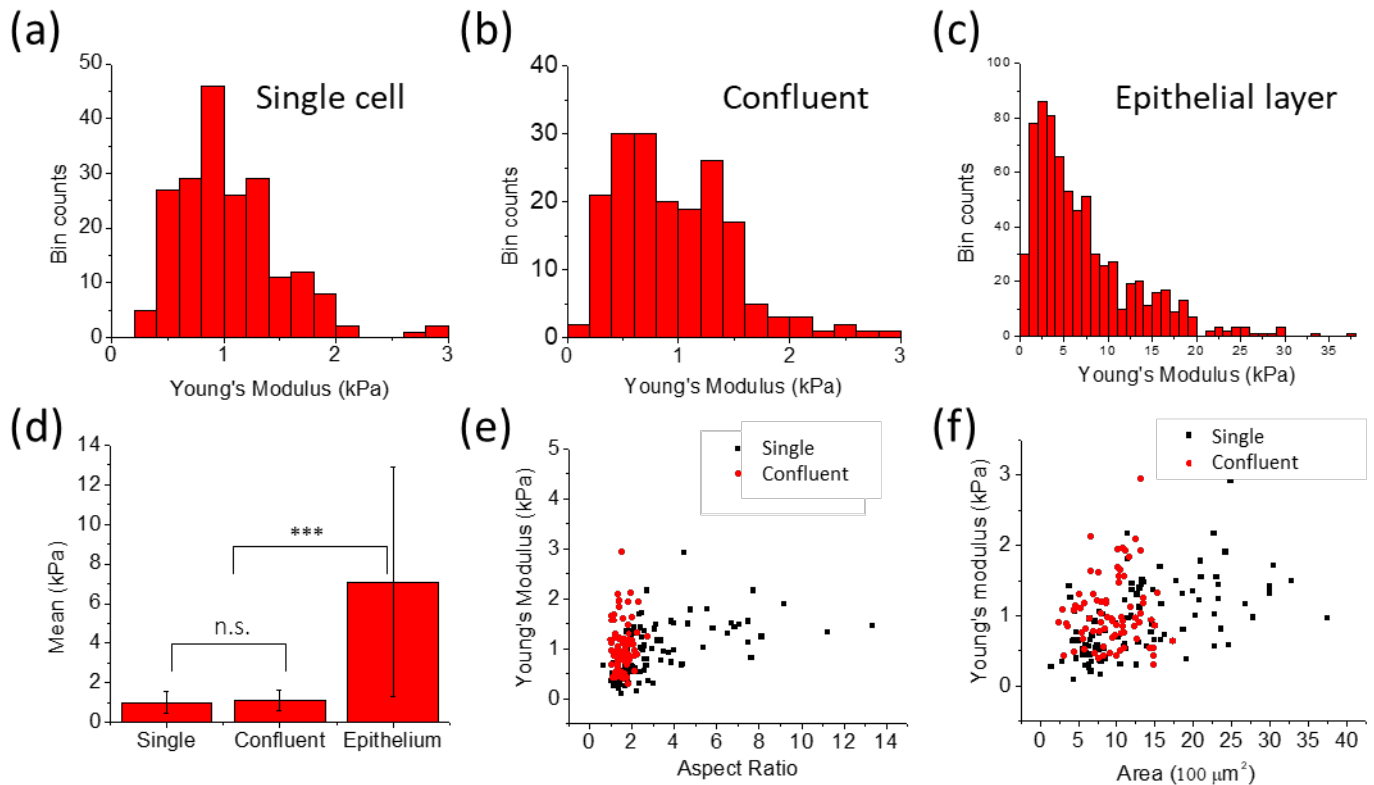

1  
2 *Figure 3. Histograms of the Young's moduli obtained from single AFM indentations of single cells (a), confluent cells*  
3 *(b), and cells in an epithelial layer (c). (d) Mean Young's modulus plots from the histograms. (e) Young's modulus vs*  
4 *aspect ratio plot. (f) Young's modulus vs area. Pearson's correlation coefficient analysis results in correlations for*  
5 *single cells between the Young's modulus and cell aspect ratio ( $R = 0.51$ ) and area ( $R = 0.47$ ). The same analysis on*  
6 *confluent cells showed they were uncorrelated for both aspect ratio ( $R = 0.06$ ) as well as for area ( $R = -0.06$ ).*

## 7 Stiffness Maps of Cells

8 To investigate the correlation between actin filament formation and cell stiffness, fluorescence  
9 microscope images of the stained actin filaments of cells were taken, followed by force mapping of the  
10 same cells with the AFM (Fig. 4). It can be seen that single cells have the lowest stiffness, and there were  
11 no distinct features in the stiffness map that correspond to actin formation. This is likely because there  
12 are no actin filaments directly contributing to the stiffness except for cortical actin; actin is found in the  
13 basal stress fibers and the diffuse cortical actin. The reason why the edges of the single cell were stiffer  
14 is due to the thin film effect – the stiffness of the substrate is 'felt' when measurements are done on  
15 thin films. In the case of confluent cells, the Young's modulus of the central region of the cells with no  
16 distinct actin formation was similar to that of a single cell. However, the Young's moduli of the regions  
17 with circumferential actin filaments are twice as stiff as the central regions of the cell. In the case of the  
18 epithelium, cell stiffness markedly increased over the whole area. In the cell-to-cell contact regions of  
19 the epithelium, dense actin filaments are formed, and the stiffness was highest in these regions with  
20 values of 10-14 kPa. The images indicate that overall, the Young's modulus tends to have higher values  
21 in regions where actin filaments are dense.

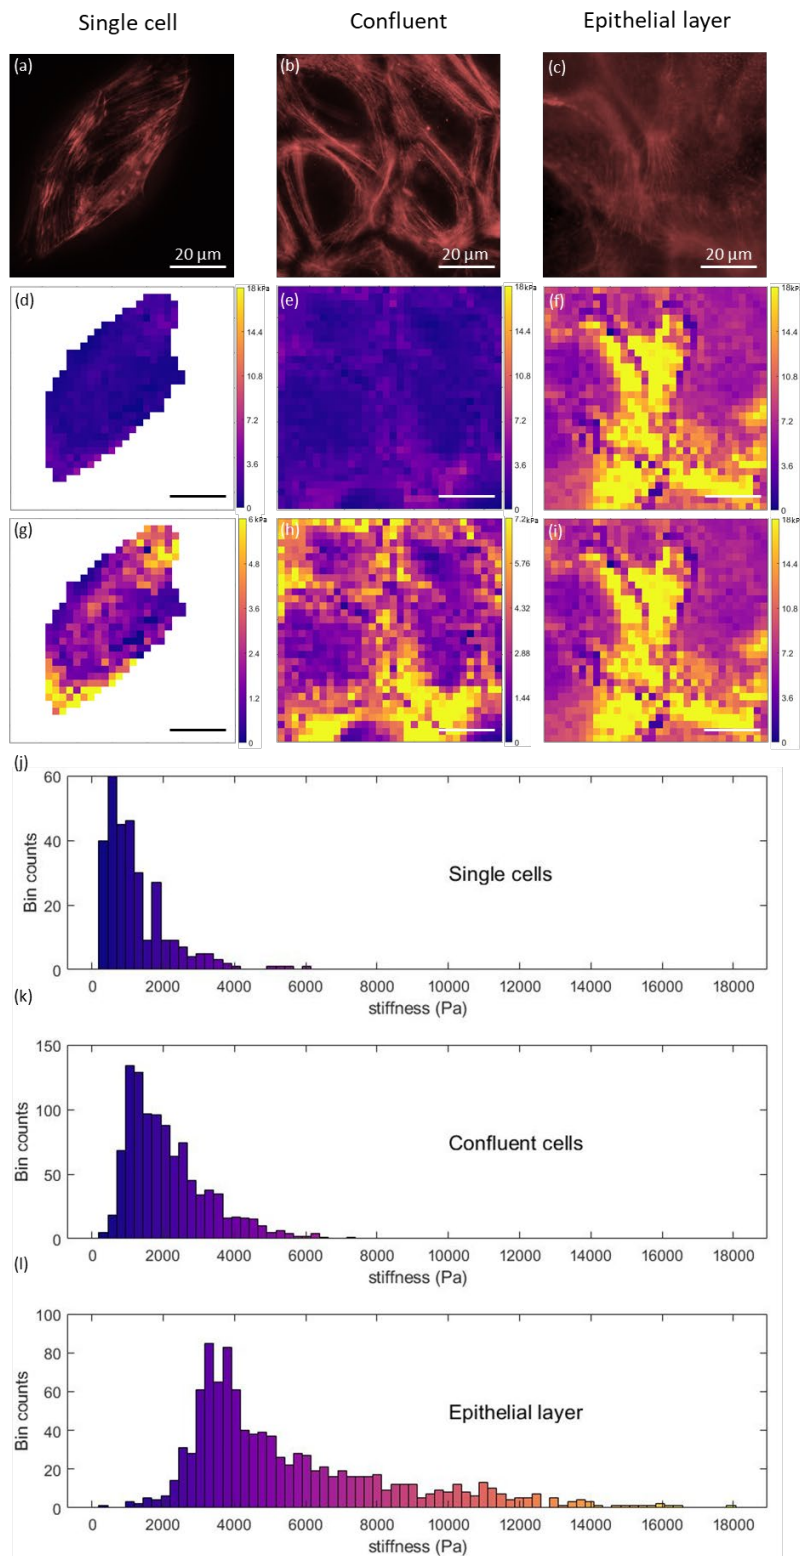

1  
2 Figure 4. (a),(b),(c) Fluorescence images of actin filaments of HMECs in single, confluent and mature epithelial layer  
3 states. (d),(e),(f) Stiffness maps using the same Young's modulus scale. (g),(h),(i) Stiffness maps using a normalized  
4 scale (not the same across images). (j), (k), (l) Histogram plots for each stiffness map. The histogram color map has  
5 the same values as the color map for images in (d), (e), (f).

1

## 2 **F-actin Distribution via Confocal Microscopy**

3 To investigate how actin filament formation changes due to increased cell-cell interactions as cells reach  
4 confluence, images of SiR-actin stained actin filaments were taken by confocal microscopy. Fig. 5 shows  
5 actin filament formation in the apical (Fig. 5a-c), mid-height (Fig. 5d-f) and basal planes (Fig. 5g-i) of  
6 single and confluent cells, and the epithelial layer. In single cells, only the cortical actin mesh network,  
7 which underlies the inner surface of the plasma membrane, is observed in both the apical (Fig. 5 a) and  
8 mid-height (Fig. 5d) focal planes. In the basal plane of the single cell (Fig. 5g), extensive circumferential  
9 stress fibers were observed. Unlike Fig. 2j, in which dorsal stress fibers were seen in a migrating cell,  
10 there are no dorsal stress fibers seen here, indicating that this single cell was not migrating in a specific  
11 direction. The cross-sectional image of the single cell (Fig. 5j) shows a typical morphology of an adherent  
12 cell which has a planoconvex shape in the middle. In confluent cells, except for the central region of the  
13 cells, dense actin filament bundles surrounding the cells were observed in the apical (Fig. 5b) and mid-  
14 height (Fig. 5e) focal planes. In the basal focal plane of the confluent cells (Fig. 5h), randomly oriented  
15 stress fibers were observed, and stress fibers have mostly disappeared in some of the cells. In the cross-  
16 sectional images of confluent cells (Fig. 5k), cells remained roundish, but the actin filaments were  
17 prominent, underlying the inner surface of the plasma membranes close to the cell-cell contact regions.

18 Cells in the apical level of the epithelial layer (Fig. 5c) were observed to have actin formation intricately  
19 intertwined between the cells. In the mid-height plane (Fig. 5f), the actin filaments forming the  
20 boundaries between cells were observed. In the basal plane (Fig. 5i), most of the stress fibers  
21 disappeared and remained in the form of dots with actin at the cell boundaries. In the cross-sectional  
22 image of the epithelium (Fig. 5 l), it was observed that the cells were arranged in an array of cubes under  
23 the very flat, apical actin layer (see also Fig. S1 in the supplementary information, which shows  
24 additional projections through the cells from apical to the basal region illustrating the mature epithelial  
25 layer structure).

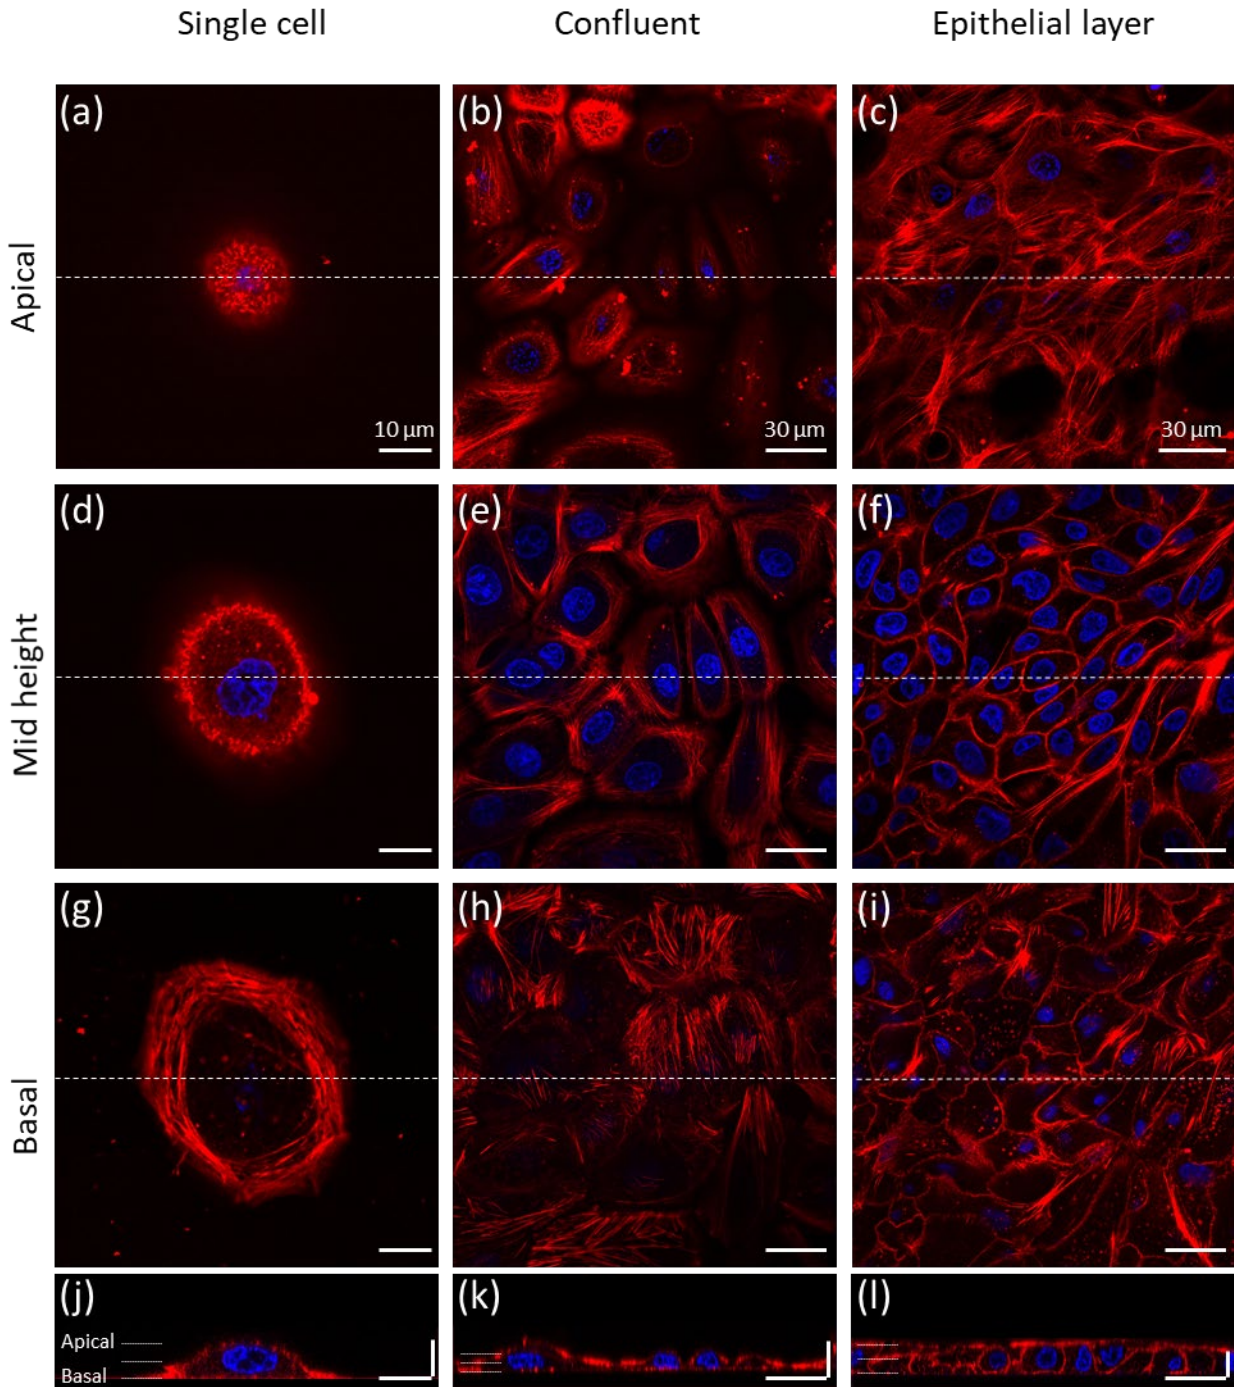

1

2 *Figure 5 Confocal microscope images of F-actin (red) and nuclei (blue) of HMECs taken in (a), (b), (c) apical, (d), (e),*  
3 *(f) mid-height, and (g), (h), (i) basal focal planes. (j), (k), (l) Cross-sectional view. Horizontal scale bars are 10 μm for*  
4 *single cells and 30 μm for confluent and epithelial layer cells; each vertical scale bar is 10 μm.*

5

6

7

## 1 Discussion

2 *Significance and summary of results.* Physiologically, epithelial cells line surfaces and ducts in the body  
3 that may come into contact with the external environment. Their tasks include providing a protective  
4 biological, chemical and physical barrier; being able to respond to physical forces and disturbances; and  
5 being able to migrate and rearrange in response to external stimuli and insults. The mechanical  
6 properties of epithelial cells are, therefore, critical to their function. Moreover, they are also of interest  
7 to cancer researchers as many cancers start in the epithelium.

8 Human mammary epithelial cells (HMEC) form a stratified cuboidal epithelium, which differs from a  
9 simple epithelium in that it is multilayered. It is typically found in gland linings that are specialized in  
10 selective absorption and secretion, that need to withstand mechanical or chemical insults, and where  
11 cells might be abraded. Cell strata in these epithelia become flatter as the strata become more apical<sup>49</sup>.

12 Numerous studies have examined the mechanical properties of both single and confluent epithelial cells.  
13 However, few, if any, studies have examined the mechanical properties of cells in a mature epithelial  
14 layer, and how mechanical properties change as cells transition from single cells to an epithelial layer.

15 The goal of our work was to determine the changes in gross morphology, cell mechanical properties  
16 (stiffness) and actin distribution in human mammary epithelial cells as they transition from single cells to  
17 confluent cells to an epithelial layer configuration. We used the following methods to characterize the  
18 cells: AFM imaging, fluorescence imaging, AFM-based nanoindentation, AFM force mapping with a 5.3  
19  $\mu\text{m}$  micro-bead probe, and confocal microscopy. Our key findings were:

- 20 1) **Morphology.** Single, isolated cells are roundish (planoconvex) and tall (8.5  $\mu\text{m}$ ); confluent cells  
21 have a flatter, less tall morphology; and mature epithelial layers have a flat top surface (apical  
22 side).
- 23 2) **Average stiffness vs. cell morphology.** Single, isolated cells are comparatively soft (1 kPa);  
24 confluent cells, even though they are flatter, still have an average modulus of 1 kPa; mature  
25 epithelial layers are, on average, much stiffer (7 kPa). Here, stiffnesses were measured over the  
26 cell center.
- 27 3) **Stiffness vs. area.** The stiffness of single, isolated cells positively correlates with their aspect  
28 ratio and their area.
- 29 4) **Stiffness maps.** Force volume measurements (stiffness maps) with a resolution of 2.5  $\mu\text{m}$  reveal  
30 the fine spatial structure of cell stiffness. For single cells, stiffness is mostly uniform across the  
31 cell. For confluent cells, the stiffness is higher by a factor of two in the region that adjoins other  
32 cells as compared to the central region of the cell. For packed cells in an epithelial layer of cells,  
33 the region adjoining other cells is also stiffer than the central region, and overall, these cells are  
34 significantly stiffer (factor of 7) than single or confluent cells.
- 35 5) **Actin distribution.** The actin distribution changes significantly during the single cell to epithelial  
36 layer transition. In single cells, actin is mostly seen as stress fibers in the basal plane (indicative  
37 of migrating cells) and as diffuse cortical actin on the apical side. In confluent cells, there are still  
38 some, but less pronounced stress fibers in the basal plane. Actin is starting to be seen in the  
39 region where cells adjoin. In cells that have formed an epithelial layer, basal stress fibers have

1 largely disappeared. Actin is pronounced and distinct in a strong band in the regions where cells  
2 adjoin. Moreover, there are clear actin fibers and actin accumulation in the apical plane. There is  
3 an additional layer of cells, on top of the basal plane cells. These top cells are very flat, spread-  
4 out and actin-rich. A visual summary of these morphological observations is given in Fig. 6.

5

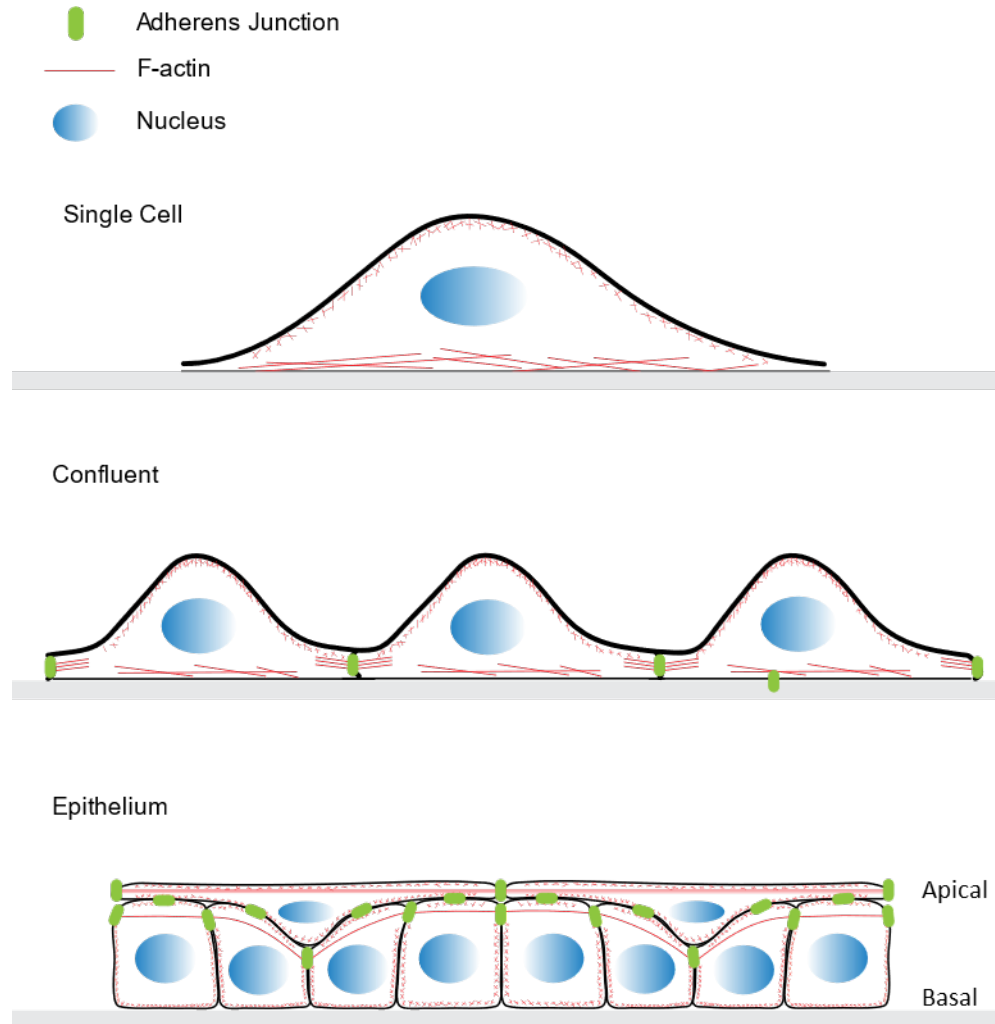

6

7 *Figure 6. Schematic indicating progression of human mammary epithelial cell states. Isolated cells are roundish*  
8 *(planoconvex), tall (8.5  $\mu\text{m}$ ) and soft (1 kPa) with actin stress fibers at the basal plane. Confluent cells begin to*  
9 *flatten out; they are still soft (average, 1 kPa) with increased stiffness (2 kPa) and actin accumulation in the region*  
10 *of abutting cells, actin stress fibers at the basal plane start to disappear. Basal cells in an epithelial layer become*  
11 *cuboidal in shape, apical cells are very flat and actin-rich. Significant actin accumulates in the region of abutting*  
12 *cells. The average stiffness of the layer as measured from the top is significantly enhanced (7 kPa), with local*  
13 *stiffness in abutting regions reaching stiffnesses up to 30 kPa.*

14



1 *Cell stiffness in context of current literature.* Our results on the AFM-measured modulus of *single,*  
2 *isolated* cells largely agree with values reported in the literature; typical stiffness values are on the order  
3 of 1 kPa for epithelial cells for indentation speeds on the order of several  $\mu\text{m}/\text{s}$ <sup>43–45,50</sup>. Compared to  
4 other cell types, single epithelial cells are soft; they are slightly stiffer than the very soft neurons<sup>6</sup> (0.4  
5 kPa), but significantly softer than cardiomyocytes<sup>7</sup> (35 kPa) and osteoblasts<sup>51</sup> (8.3 kPa). The tall, roundish  
6 morphology we observed also agrees with the shape of single epithelial cells reported in the  
7 literature.<sup>35,36</sup> Pronounced actin stress fibers at the basal plane indicate migrating cells, while the diffuse  
8 cortical actin distribution is indicative of a soft apical region.

9 As cells become confluent, but not yet tightly packed and layered, cells are sensing each other, and they  
10 are forming adherens junctions<sup>40,52</sup>. In epithelial cells, the formation of adherens junctions triggers a  
11 decrease in RhoA activity and an increase in Rac1 and Cdc42 activity; it gives rise to slowed migration, a  
12 decrease in stress fibers, the formation of focal adhesions, and actin accumulation in the regions where  
13 cells abut<sup>53,54</sup>. Our observations agree with these changes, as shown in Fig. 5e & h. Concurrently, the  
14 stiffness in the peripheral cellular regions increases, while the stiffness in the center of the cell remains  
15 the same. The modulus we observed for confluent cells largely agrees with values reported in the  
16 literature for confluent epithelial cells<sup>43–45</sup>. As epithelial cells become confluent, it was observed that the  
17 modulus stays the same or slightly increases (by up to a factor of 2). The slight discrepancy between  
18 either staying the same or slightly increasing may be explained by the following factors. Different  
19 epithelial cell types or measuring conditions were used across the different experiments. Additionally, as  
20 can be seen in Fig. 4 h, the modulus varies depending on where on the cell it is measured; it is twice as  
21 stiff in the peripheral region. Finally, as our data show, a confluent layer is not the final stage of cell  
22 progression as cells further develop into an epithelial layer, which is several-fold stiffer. The somewhat  
23 higher stiffness values reported in the literature may have been on confluent cells that were  
24 transitioning to the epithelial layer stage.

25 Specifically, the following reports constitute some of the relevant key studies on the stiffness of  
26 epithelial cells. Guo et al.<sup>43</sup> found that single, isolated HMECs (same cells we used) had a modulus of 1  
27 kPa and they were 1.5 times softer than (sub-)confluent cells, while immortalized, tumorigenic, and  
28 metastatic cells (MDA-MB-231) did not (or only marginally) change in response to being surrounded by  
29 other cells. Similarly, Schierbaum et al.<sup>55</sup> found that single mammary epithelial cells (MCF10A) are softer  
30 by a factor of 2 compared to cells in a confluent layer. Again, this change in stiffness was not seen in  
31 MCF7 and MDA-MB-231 cells. This lack of change in stiffness of the cancer cell lines with respect to  
32 confluency might relate to the lack of e-cadherin expression and a diminished F-actin belt. This, in turn,  
33 could result in deregulated cell proliferation as mechanical tension from adherens junctions and F-actin  
34 plays an important role in regulating cell proliferation.<sup>22,56</sup> Absolute stiffness values were about 10 times  
35 larger in Schierbaum et al. as compared to Guo et al. and compared to the current study. This may be  
36 due to Schierbaum using sharp probes and somewhat different substrate and media conditions. Using  
37 dynamic, frequency-dependent, AFM-based mechanical measurements, Rother et al.<sup>50</sup> found that  
38 malignant cells (tumorigenic MCF-7 and metastatic MDA-MB231) are typically softer than their benign  
39 counterparts (MCF-10A), and that malignant cells have a lower loss tangent (are more fluid-like). The  
40 Young's modulus, as calculated from  $E = 2(1+\nu)G'$  is 4.5 kPa for MCF-10A cells (immortalized, benign

1 cells similar to our HMECs) for indentation speeds and indentation depth similar to those in our  
2 measurements. In a series of publications, the Janshoff lab investigated the viscoelastic properties of  
3 Madin-Darby canine kidney cells, strain II (MDCK II) using two dynamic AFM-based indentation methods,  
4 oscillatory microrheology (OMR, tip performs small, 40 nm oscillations during indentation) and force  
5 cycle experiments (FCE, cyclic indentation curves).<sup>44,57-59</sup> Their modulus values for confluent cells agrees  
6 with our values (~1 kPa).

7 Notably, the mechanical properties of cells in stratified epithelial layers, which is the natural  
8 physiological state of mammary epithelial cells, has not been investigated in the past. We found that  
9 cells undergo a significant transformation as they arrange in a mature, epithelial layer. Cells become, on  
10 average, stiffer by a factor of 7. Stiffness is not uniform, as it is significantly higher in the regions where  
11 cells abut. Moreover, actin is seen in a strong, distinct belt in this region (especially visible in Fig. 5 f).  
12 There are, furthermore, flat, actin-rich cells on top of the lower cells, which is expected for HMECs as  
13 they form a stratified epithelial layer. This actin distribution and stiffening strongly suggest that thick  
14 actin fibers are a major determinant of cell stiffness (see *Actin* section below). It also suggests that this is  
15 physiologically important as the epithelial layer forms a barrier against external insults.

16 *Justification of Hertz model and error sources.* We used the Hertz model of a hard sphere indenting an  
17 elastic plane to determine the Young's modulus of cells (eq. 1). Although some approximations are  
18 made when this model is applied to cell indentations, the following considerations support its use: 1) It  
19 is straight-forward; 2) it has a relatively small, estimable error as compared to other, more complex  
20 methods (see below); 3) it allows easy comparison of cell stiffness data across labs; 4) the obtained  
21 results are physiologically meaningful; and 5) the obtained modulus can be easily compared with the  
22 moduli of numerous other materials. The error due to measurement geometry is small as the radius of  
23 the indenting sphere can be accurately determined and the cell surface is reasonably planar. The fits of  
24 this model to our experimental data are excellent. Another error comes from the fact that cells are  
25 viscoelastic objects, whereas the Hertz model treats cells as elastic objects. This error can be estimated  
26 from dynamic, AFM-based indentation methods that allow a separation of the viscous and elastic  
27 component of the modulus. Brückner et al.<sup>60</sup> found that the elastic component dominates at  
28 indentations speeds of 2  $\mu\text{m/s}$ , (similar to our 5  $\mu\text{m/s}$ ), since the power law coefficient  $\beta$  for epithelial  
29 cells is in the range of 0.25 to 0.3 ( $\beta = 0$  means completely elastic deformation,  $\beta = 1$  means Newtonian  
30 fluid with completely viscous deformation). Similarly, Schierbaum et al.<sup>55</sup> determined a power-law  
31 exponent,  $\beta$ , of 0.1 and 0.12 for confluent and single MCF-10A cells, and 0.2 and 0.15 for MCF7 and  
32 MDA-MB-213 cells. These relatively low values of  $\beta$  justify using the elastic Hertz model to a first  
33 approximation; adding the viscous component into the elastic component (as is done when applying the  
34 Hertz model) results in an about 10-30% overestimation of the elastic component. Brueckner et al.  
35 found an elastic modulus (separate from the viscous component) of 0.6 kPa to 0.8 kPa for confluent  
36 MDCK II epithelial cells (indentation depth up to 1  $\mu\text{m}$ ). This is in very good agreement with our  
37 measurement of 1 kPa for the total modulus (elastic and viscous part), with the caveat that it was two  
38 different types of epithelial cells (MDCK II vs. HMEC).

39 There may be additional error sources; however, all of them are smaller than the factor of 7 increase in  
40 stiffness we observe for epithelial layer cells. Our indentations were small enough (600 nm to 1000 nm)

1 to not ‘feel’ the nucleus or the hard glass substrate underneath the cell. In some instances when taking  
2 measurements over the thin, peripheral section of single cells, the shape of the indentation curve  
3 actually did deviate significantly from the Hertz model, resulting in very high stiffness values. In these  
4 instances, the substrate stiffness was measured, and these data were eliminated. Typically, the probe-  
5 sample contact point in the force-indentation curves was well defined (Fig. 1b), indicating that these  
6 cells have a thin glycocalyx. Our experiments were all carried out on a hard, functionalized substrate  
7 (collagen- and laminin-treated glass) in temperature-controlled (36.5°C) and pH-controlled media.  
8 Recently, it was shown that cell stiffness is somewhat influenced by the stiffness of the substrate, as  
9 cells grown on stiff substrates are about 1.5 to 3 times stiffer than cells on soft substrates.<sup>61,62</sup>  
10 However, the stiffening factor due to the transition from single/confluent cells to a mature epithelial  
11 layer is 7 and, thus, much larger than the substrate-dependent factor of 1.5.

12 *Role of Actin.* A central theme of our work concerning cell mechanical and morphological properties is  
13 the role of reorganized actin filaments. Determining the underlying elements that influence cell  
14 mechanical properties is currently a highly active research area; though, actin filaments are emerging as  
15 a major factor. Our data, and literature reports<sup>43,60</sup>, suggest that cells possess a baseline stiffness of  
16 around 500 - 1000 Pa that may originate from the cytoplasm, the nucleus, the membrane, and  
17 cytoskeletal filaments, or a combination of these factors. Our data, and data in the literature, also  
18 suggest that enhanced stiffness – on top of the baseline stiffness – correlates with increased actin  
19 density. Fig. 4 shows that enhanced stiffness is measured in the region where cells abut, and the  
20 enhanced stiffness strongly co-localizes with dense actin filament bundles in confluent cells and in the  
21 epithelial layer cells. This agrees with the observations by Schierbaum et al.<sup>55</sup>. Enhanced stiffness is also  
22 seen in epithelial layer cells, in general, and it again strongly co-localizes with dense actin filament  
23 bundles. Several studies found that actin filaments play a major role in determining cell stiffness.  
24 Notably, treatment of cells with reagents, such as cytochalasin and latrunculin, which promote actin  
25 depolymerization, resulted in cells with significantly decreased stiffness.<sup>29–33,58,60</sup> On the other hand,  
26 depolymerizing microtubules by treating cells with nocodazole had only marginal effects on cell stiffness  
27 and shape,<sup>29,32–34</sup> suggesting that microtubules are only a minor contributor to cell stiffness.  
28 Furthermore, time-resolved measurements of cell stiffness on cells during monolayer formation showed  
29 that an increase in stiffness of the monolayer correlated with the assembly of adherens junctions but  
30 not desmosomes.<sup>46</sup> This suggests intermediate filaments only play a minor role in cell stiffness.  
31 Additionally, diffuse cortical F-actin, as seen in the confocal images of single cell (Fig. 5a & d), does not  
32 appear to correlate with the enhanced stiffness, since the cortical F-actin does not vary noticeably with  
33 stiffness.

34 *Cell stiffness and cell geometric factors.* The data in Fig. 3e & f regarding stiffness as a function of aspect  
35 ratio and as a function of cell area suggest that geometric factors correlate to cell stiffness for single  
36 cells but not for confluent cells. Lemmon et al. and Califano et al. demonstrated that the spreading area  
37 of a cell positively correlates with the magnitude of traction forces generated by the cell<sup>63,64</sup>. A balance  
38 between the traction force, cortical membrane tension and the cytoplasmic pressure is required to  
39 maintain cell shape. This implies that larger cells maintain a stronger tensional prestress. Since prestress  
40 strongly affects cell stiffness,<sup>65–69</sup> it is expected that cells with a large spreading area are stiffer than cells  
41 with a small spreading area. This is consistent with our data showing that stiffness increases with cell

1 area for single cells (Fig. 2f). Similar correlations were found in endothelial cells<sup>9</sup>. Cell area of single cells  
2 also correlated with their aspect ratio (Fig. S2), which is possibly due to a correlation between aspect  
3 ratio and cells stiffness (Fig. 2e). In contrast, in confluent cells, there was no correlation between those  
4 geometrical factors and stiffness. (Fig. 2f & g). This is probably because in confluent cells tensional  
5 prestress originates from actomyosin filaments linked to adherens junctions, and not from  
6 counterbalancing forces against traction forces, which depend on cell area. This view is supported by the  
7 observation that basal stress fibers and focal adhesions decrease as cells become confluent.

8 Even though we did not quantitatively measure the spreading area and height of the cells on the top of  
9 the epithelial layer, these cells appeared to be 3-4 times wider and thinner than the basal cells (Fig. 1,  
10 Fig. 5, Fig. S1). This extremely stretched and flattened morphology possibly indicates that much stronger  
11 tension was loaded over the cells on the top layer, making the cells recruit a large amount of actomyosin  
12 filaments at the adherens junctions to provide tension and maintain the cell shape, which, in turn,  
13 caused the dramatically enhanced stiffness.

14 **Conclusions.** In summary, we found that HMECs possess significantly different mechanical properties  
15 along with different F-actin distributions as they transition from single to confluent to mature epithelial  
16 layer cells. The observed significant stiffening of cells in an epithelial layer is likely physiologically  
17 important, providing protection against external insults. There are likely additional intermediate  
18 transitioning states between confluent cells and mature epithelial cells, in which the stiffnesses  
19 progressively increase. Future work will focus on investigating the detailed mechanisms by which the  
20 cells on the top of the mature epithelial layer become flat and stiff. Our findings advance the  
21 understanding of breast ductal morphogenesis and mechanical homeostasis.

22 **Acknowledgements.** This work was supported by an instrumentation grant for the AFM from the North  
23 Carolina Biotechnology Center (NCBC; 2014-IDG-1012), and grants from the Discover Institute and the  
24 NIH (1R15HL148842). We are grateful to Dr. Adam Hall, who is the PI of the NCBC instrumentation grant;  
25 to Heather Brown-Harding, who is the head of the Wake Downtown confocal microscope facility at  
26 Wake Forest University; to Pierre-Alexandre Vidi for helpful discussions; and to Amanda Smelser for help  
27 with cell culture work.

28

29

## 1 Supplementary Information

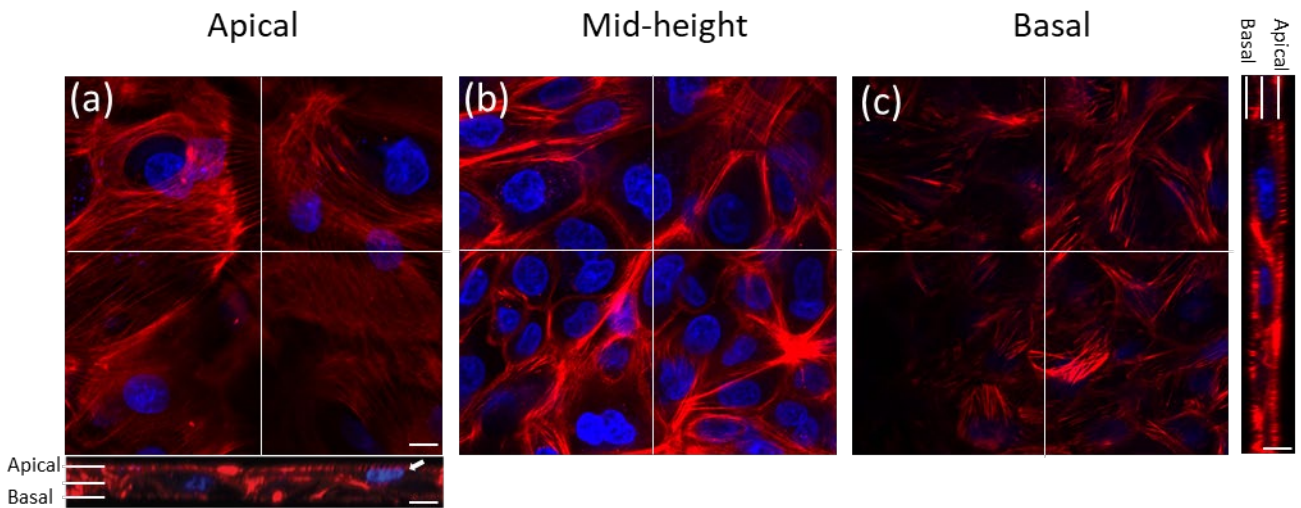

2

3

4 *Figure S1.* Confocal microscope images of F-actin (red) and nuclei (blue) of HMECs in an epithelial layer taken in (a)  
5 apical, (b) mid-height, and (c) basal focal planes. The white arrow in the horizontal cross-sectional view indicates a  
6 cell on the top layer of the epithelial layer. The scale bar is 10  $\mu\text{m}$ .

7

8

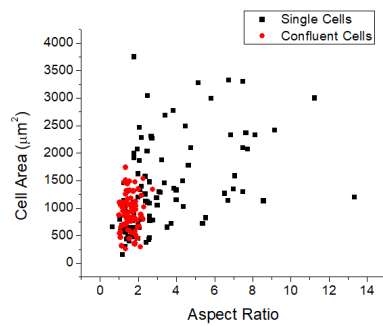

9

10 *Figure S2.* Cell area vs Aspect ratio plot for single cells and confluent cells.

11

1 **References**

- 2 1. Hochmuth RM. Micropipette aspiration of living cells. *J Biomech.* 2000;33(1):15-22.  
3 doi:10.1016/S0021-9290(99)00175-X
- 4 2. Kuznetsova TG, Starodubtseva MN, Yegorenkov NI, Chizhik SA, Zhdanov RI. Atomic force  
5 microscopy probing of cell elasticity. 2007;38:824-833. doi:10.1016/j.micron.2007.06.011
- 6 3. Zhang H, Liu K-K. Optical tweezers for single cells. *J R Soc Interface.* 2008;5(24):671-690.  
7 doi:10.1098/rsif.2008.0052
- 8 4. Bausch AR, Möller W, Sackmann E. Measurement of local viscoelasticity and forces in living cells  
9 by magnetic tweezers. *Biophys J.* 1999;76(11):573-579. doi:10.1016/S0006-3495(99)77225-5
- 10 5. Rodriguez ML, McGarry PJ, Sniadecki NJ. Review on Cell Mechanics: Experimental and Modeling  
11 Approaches. *Appl Mech Rev.* 2013;65(6):060801. doi:10.1115/1.4025355
- 12 6. Spedden E, White JD, Naumova EN, Kaplan DL, Staii C. Elasticity maps of living neurons measured  
13 by combined fluorescence and atomic force microscopy. *Biophys J.* 2012;103(5):868-877.  
14 doi:10.1016/j.bpj.2012.08.005
- 15 7. Lieber SC, Aubry N, Pain J, Diaz G, Kim S-J, Vatner SF. Aging increases stiffness of cardiac  
16 myocytes measured by atomic force microscopy nanoindentation. *Am J Physiol Circ Physiol.*  
17 2004;287(2):H645-H651. doi:10.1152/ajpheart.00564.2003
- 18 8. Théry M, Bornens M. Get round and stiff for mitosis. *HFSP J.* 2008;2(2):65-71.  
19 doi:10.2976/1.2895661
- 20 9. Stroka KM, Aranda-Espinoza H. Effects of morphology vs. cell-cell interactions on endothelial cell  
21 stiffness. *Cell Mol Bioeng.* 2011;4(1):9-27. doi:10.1007/s12195-010-0142-y
- 22 10. Bangasser BL, Shamsan GA, Chan CE, et al. Shifting the optimal stiffness for cell migration. *Nat*  
23 *Commun.* 2017;8(1):15313. doi:10.1038/ncomms15313
- 24 11. Luo Q, Kuang D, Zhang B, Song G. Cell stiffness determined by atomic force microscopy and its  
25 correlation with cell motility. *Biochim Biophys Acta - Gen Subj.* 2016;1860(9):1953-1960.  
26 doi:10.1016/j.bbagen.2016.06.010
- 27 12. Khani M-M, Tafazzoli-Shadpour M, Rostami M, Peirovi H, Janmaleki M. Evaluation of Mechanical  
28 Properties of Human Mesenchymal Stem Cells During Differentiation to Smooth Muscle Cells.  
29 *Ann Biomed Eng.* 2014;42(7):1373-1380. doi:10.1007/s10439-013-0889-0
- 30 13. An SS, Fabry B, Trepast X, Wang N, Fredberg JJ. Do Biophysical Properties of the Airway Smooth  
31 Muscle in Culture Predict Airway Hyperresponsiveness? *Am J Respir Cell Mol Biol.* 2006;35(1):55-  
32 64. doi:10.1165/rcmb.2005-0453OC
- 33 14. Qiu H, Zhu Y, Sun Z, et al. Short Communication: Vascular Smooth Muscle Cell Stiffness As a  
34 Mechanism for Increased Aortic Stiffness With Aging. *Circ Res.* 2010;107(5):615-619.  
35 doi:10.1161/CIRCRESAHA.110.221846
- 36 15. Berdyeva TK, Woodworth CD, Sokolov I. Human epithelial cells increase their rigidity with ageing  
37 in vitro: Direct measurements. *Phys Med Biol.* 2005;50(1):81-92. doi:10.1088/0031-  
38 9155/50/1/007

- 1 16. Starodubtseva MN. Mechanical properties of cells and ageing. *Ageing Res Rev.* 2011;10(1):16-25.  
2 doi:10.1016/j.arr.2009.10.005
- 3 17. Cross SE, Jin Y-S, Rao J, Gimzewski JK. Nanomechanical analysis of cells from cancer patients. *Nat*  
4 *Nanotechnol.* 2007;2(12):780-783. doi:10.1038/nnano.2007.388
- 5 18. Kim T-H, Gill NK, Nyberg KD, et al. Cancer cells become less deformable and more invasive with  
6 activation of  $\beta$ -adrenergic signaling. *J Cell Sci.* 2016;jcs.194803. doi:10.1242/jcs.194803
- 7 19. Plodinec M, Loparic M, Monnier CA, et al. The nanomechanical signature of breast cancer. *Nat*  
8 *Nanotechnol.* 2012;7(11):757-765. doi:10.1038/nnano.2012.167
- 9 20. Alibert C, Goud B, Manneville JB. Are cancer cells really softer than normal cells? *Biol Cell.*  
10 2017;109(5):167-189. doi:10.1111/boc.201600078
- 11 21. Humphrey JD, Dufresne ER, Schwartz MA. Mechanotransduction and extracellular matrix  
12 homeostasis. *Nat Rev Mol Cell Biol.* 2014;15(12):802-812. doi:10.1038/nrm3896
- 13 22. Furukawa KT, Yamashita K, Sakurai N, Ohno S. The Epithelial Circumferential Actin Belt Regulates  
14 YAP / TAZ through Nucleocytoplasmic Shuttling of Article The Epithelial Circumferential Actin Belt  
15 Regulates YAP / TAZ through Nucleocytoplasmic Shuttling of Merlin. *CellReports.*  
16 2017;20(6):1435-1447. doi:10.1016/j.celrep.2017.07.032
- 17 23. Jaalouk DE, Lammerding J. Mechanotransduction gone awry. *Nat Rev Mol Cell Biol.*  
18 2009;10(1):63-73. doi:10.1038/nrm2597
- 19 24. Das T, Safferling K, Rausch S, Grabe N, Boehm H, Spatz JP. A molecular mechanotransduction  
20 pathway regulates collective migration of epithelial cells. *Nat Cell Biol.* 2015;17(3):276-287.  
21 doi:10.1038/ncb3115
- 22 25. Ridley AJ, Hall A. The small GTP-binding protein rho regulates the assembly of focal adhesions  
23 and actin stress fibers in response to growth factors. *Cell.* 1992;70(3):389-399. doi:10.1016/0092-  
24 8674(92)90163-7
- 25 26. Braga VMM, Machesky LM, Hall A, Hotchin NA. The Small GTPases Rho and Rac Are Required for  
26 the Establishment of Cadherin-dependent Cell-Cell Contacts. *J Cell Biol.* 1997;137(6):1421-1431.  
27 doi:10.1083/jcb.137.6.1421
- 28 27. Tojkander S, Gateva G, Lappalainen P. Actin stress fibers - assembly, dynamics and biological  
29 roles. *J Cell Sci.* 2012;125(8):1855-1864. doi:10.1242/jcs.098087
- 30 28. Chugh P, Paluch EK. The actin cortex at a glance. *J Cell Sci.* 2018;131(14):jcs186254.  
31 doi:10.1242/jcs.186254
- 32 29. Rotsch C, Radmacher M. Drug-Induced Changes of Cytoskeletal Structure and Mechanics in  
33 Fibroblasts : An Atomic Force Microscopy Study. *Biophys J.* 2000;78(1):520-535.  
34 doi:10.1016/S0006-3495(00)76614-8
- 35 30. Wakatsuki T, Schwab B, Thompson NC, Elson EL. Effects of cytochalasin D and latrunculin B on  
36 mechanical properties of cells. *J Cell Sci.* 2001;114:1025-1036.  
37 <http://journals.sagepub.com/doi/10.1243/0954407001527600>.
- 38 31. Moeendarbary E, Valon L, Fritzsche M, et al. The cytoplasm of living cells behaves as a poroelastic  
39 material. *Nat Mater.* 2013;12(3):253-261. doi:10.1038/nmat3517

- 1 32. Ketene AN, Roberts PC, Shea AA, Schmelz EM, Agah M. Actin filaments play a primary role for  
2 structural integrity and viscoelastic response in cells. *Integr Biol.* 2012;4(5):540-549.  
3 doi:10.1039/c2ib00168c
- 4 33. Grady ME, Composto RJ, Eckmann DM. Cell elasticity with altered cytoskeletal architectures  
5 across multiple cell types. *J Mech Behav Biomed Mater.* 2016;61:197-207.  
6 doi:10.1016/j.jmbbm.2016.01.022
- 7 34. Celik E, Abdulreda MH, Maiguel D, Li J, Moy VT. Rearrangement of microtubule network under  
8 biochemical and mechanical stimulations. *Methods.* 2013;60(2):195-201.  
9 doi:10.1016/j.ymeth.2013.02.014
- 10 35. Li QS, Lee GYH, Ong CN, Lim CT. AFM indentation study of breast cancer cells. *Biochem Biophys*  
11 *Res Commun.* 2008;374(4):609-613. doi:10.1016/j.bbrc.2008.07.078
- 12 36. Calzado-Martín A, Encinar M, Tamayo J, Calleja M, San Paulo A. Effect of Actin Organization on  
13 the Stiffness of Living Breast Cancer Cells Revealed by Peak-Force Modulation Atomic Force  
14 Microscopy. *ACS Nano.* 2016;10(3):3365-3374. doi:10.1021/acs.nano.5b07162
- 15 37. Guck J, Schinkinger S, Lincoln B, et al. Optical Deformability as an Inherent Cell Marker for Testing  
16 Malignant Transformation and Metastatic Competence. *Biophys J.* 2005;88(5):3689-3698.  
17 doi:10.1529/biophysj.104.045476
- 18 38. Dejana E. Endothelial cell-cell junctions: Happy together. *Nat Rev Mol Cell Biol.* 2004;5(4):261-  
19 270. doi:10.1038/nrm1357
- 20 39. Garcia MA, Nelson WJ, Chavez N. Cell–Cell Junctions Organize Structural and Signaling Networks.  
21 *Cold Spring Harb Perspect Biol.* 2018;10(4):a029181. doi:10.1101/cshperspect.a029181
- 22 40. Yonemura S, Itoh M, Nagafuchi A, Tsukita S. Cell-to-cell adherens junction formation and actin  
23 filament organization: similarities and differences between non-polarized fibroblasts and  
24 polarized epithelial cells. *J Cell Sci.* 1995;108:127-142.
- 25 41. Takeichi M. Dynamic contacts: rearranging adherens junctions to drive epithelial remodelling.  
26 *Nat Rev Mol Cell Biol.* 2014;15(6):397-410. doi:10.1038/nrm3802
- 27 42. Fujii Y, Ochi Y, Tuchiya M, et al. Spontaneous Spatial Correlation of Elastic Modulus in Jammed  
28 Epithelial Monolayers Observed by AFM. *Biophys J.* 2019;116(6):1152-1158.  
29 doi:10.1016/j.bpj.2019.01.037
- 30 43. Guo X, Bonin K, Scarpinato K, Guthold M. The effect of neighboring cells on the stiffness of  
31 cancerous and non-cancerous human mammary epithelial cells. *New J Phys.* 2014;16:105002.  
32 doi:10.1088/1367-2630/16/10/105002
- 33 44. Nehls S, Nöding H, Karsch S, Ries F, Janshoff A. Stiffness of MDCK II Cells Depends on Confluency  
34 and Cell Size. *Biophys J.* 2019;116(11):2204-2211. doi:10.1016/j.bpj.2019.04.028
- 35 45. Efremov YM, Dokrunova AA, Bagrov D V., Kudryashova KS, Sokolova OS, Shaitan K V. The effects  
36 of confluency on cell mechanical properties. *J Biomech.* 2013;46(6):1081-1087.  
37 doi:10.1016/j.jbiomech.2013.01.022
- 38 46. Harris AR, Daeden A, Charras GT. Formation of adherens junctions leads to the emergence of a  
39 tissue-level tension in epithelial monolayers. *J Cell Sci.* 2014;127(11):2507-2517.



- 1 doi:10.1242/jcs.142349
- 2 47. Hutter JL, Bechhoefer J. Calibration of atomic-force microscope tips. *Rev Sci Instrum.*  
3 1993;64(7):1868-1873. doi:10.1063/1.1143970
- 4 48. Sader JE, Chon JWM, Mulvaney P. Calibration of rectangular atomic force microscope cantilevers.  
5 *Rev Sci Instrum.* 1999;70(10):3967-3969. doi:10.1063/1.1150021
- 6 49. Jenkins GW, Tortora GJ. *Anatomy and Physiology from Science to Life (3rd Ed.)*; 2013.
- 7 50. Rother J, Nöding H, Mey I, Janshoff A. Atomic force microscopy-based microrheology reveals  
8 significant differences in the viscoelastic response between malign and benign cell lines. *Open*  
9 *Biol.* 2014;4(5):140046. doi:10.1098/rsob.140046
- 10 51. Sugawara Y, Ando R, Kamioka H, et al. The alteration of a mechanical property of bone cells  
11 during the process of changing from osteoblasts to osteocytes. *Bone.* 2008;43(1):19-24.  
12 doi:10.1016/j.bone.2008.02.020
- 13 52. Harris TJC, Tepass U. Adherens junctions : from molecules to morphogenesis. *Nat Rev Mol Cell*  
14 *Biol.* 2010;11(July):502. doi:10.1038/nrm2927
- 15 53. Noren NK, Niessen CM, Gumbiner BM, Burridge K. Cadherin Engagement Regulates Rho family  
16 GTPases. *J Biol Chem.* 2001;276(36):33305-33308. doi:10.1074/jbc.C100306200
- 17 54. Takaishi K, Sasaki T, Kotani H, Nishioka H, Takai Y. Regulation of Cell–Cell Adhesion by Rac and  
18 Rho Small G Proteins in MDCK Cells. *J Cell Biol.* 1997;139(4):1047-1059.  
19 doi:10.1083/jcb.139.4.1047
- 20 55. Schierbaum N, Rheinlaender J, Schäffer TE. Viscoelastic properties of normal and cancerous  
21 human breast cells are affected differently by contact to adjacent cells. *Acta Biomater.*  
22 2017;55:239-248. doi:10.1016/j.actbio.2017.04.006
- 23 56. Dupont S, Morsut L, Aragona M, et al. Role of YAP/TAZ in mechanotransduction. *Nature.*  
24 2011;474(7350):179-183. doi:10.1038/nature10137
- 25 57. Pietuch A, Brückner BR, Janshoff A. Membrane tension homeostasis of epithelial cells through  
26 surface area regulation in response to osmotic stress. *Biochim Biophys Acta - Mol Cell Res.*  
27 2013;1833(3):712-722. doi:10.1016/j.bbamcr.2012.11.006
- 28 58. Pietuch A, Brückner BR, Fine T, Mey I, Janshoff A. Elastic properties of cells in the context of  
29 confluent cell monolayers: impact of tension and surface area regulation. *Soft Matter.*  
30 2013;9(48):11490. doi:10.1039/c3sm51610e
- 31 59. Brückner BR, Nöding H, Janshoff A. Viscoelastic Properties of Confluent MDCK II Cells Obtained  
32 from Force Cycle Experiments. *Biophys J.* 2017;112(4):724-735. doi:10.1016/j.bpj.2016.12.032
- 33 60. Brückner BR, Janshoff A. Elastic properties of epithelial cells probed by atomic force microscopy.  
34 *Biochim Biophys Acta - Mol Cell Res.* 2015;1853(11):3075-3082.  
35 doi:10.1016/j.bbamcr.2015.07.010
- 36 61. Solon J, Levental I, Sengupta K, Georges PC, Janmey PA. Fibroblast Adaptation and Stiffness  
37 Matching to Soft Elastic Substrates. *Biophys J.* 2007;93(12):4453-4461.  
38 doi:10.1529/biophysj.106.101386

- 1 62. Tee S-Y, Fu J, Chen CS, Janmey PA. Cell Shape and Substrate Rigidity Both Regulate Cell Stiffness.  
2 *Biophys J*. 2011;100(5):L25-L27. doi:10.1016/j.bpj.2010.12.3744
- 3 63. Lemmon CA, Sniadecki NJ, Ruiz SA, Tan JL, Romer LH, Chen CS. Shear force at the cell-matrix  
4 interface: enhanced analysis for microfabricated post array detectors. *Mech Chem Biosyst*.  
5 2005;2(1):1-16. <http://www.ncbi.nlm.nih.gov/pubmed/16708468>.
- 6 64. Califano JP, Reinhart-King CA. Substrate Stiffness and Cell Area Predict Cellular Traction Stresses  
7 in Single Cells and Cells in Contact. *Cell Mol Bioeng*. 2010;3(1):68-75. doi:10.1007/s12195-010-  
8 0102-6
- 9 65. Wang N, Butler J, Ingber D. Mechanotransduction across the cell surface and through the  
10 cytoskeleton. *Science (80- )*. 1993;260(5111):1124-1127. doi:10.1126/science.7684161
- 11 66. Zhu C, Bao G, Wang N. Cell Mechanics: Mechanical Response, Cell Adhesion, and Molecular  
12 Deformation. *Annu Rev Biomed Eng*. 2000;2(1):189-226. doi:10.1146/annurev.bioeng.2.1.189
- 13 67. Mandriota N, Friedsam C, Jones-Molina JA, Tatem K V., Ingber DE, Sahin O. Cellular nanoscale  
14 stiffness patterns governed by intracellular forces. *Nat Mater*. 2019;18(10):1071-1077.  
15 doi:10.1038/s41563-019-0391-7
- 16 68. Wang N, Tolić-Nørrelykke IM, Chen J, et al. Cell prestress. I. Stiffness and prestress are closely  
17 associated in adherent contractile cells. *Am J Physiol Physiol*. 2002;282(3):C606-C616.  
18 doi:10.1152/ajpcell.00269.2001
- 19 69. Gardel ML, Nakamura F, Hartwig JH, Crocker JC, Stossel TP, Weitz DA. Prestressed F-actin  
20 networks cross-linked by hinged filamins replicate mechanical properties of cells. *Proc Natl Acad*  
21 *Sci*. 2006;103(6):1762-1767. doi:10.1073/pnas.0504777103

22

23
